# Supplementary material
Source: HighWire-hosted journal article supplement (http://dmd.aspetjournals.org/highwire/filestream/73427/field_highwire_adjunct_files/0/DMD85126_supplementary_table.pdf)
Supplement: DMD85126_supplementary_table.pdf [file DMD85126_supplementary_table.pdf]

**Supplementary Data for**

**Enhanced platelet response to clopidogrel in Zucker diabetic fatty rats due to impaired clopidogrel inactivation by carboxylesterase 1 and increased exposure to active metabolite**

**Hongwei Yao, Ruifeng Bai, Tianming Ren, Yani Wang, Jingkai Gu, Yingjie Guo**

**School of Life Sciences, Jilin University, Changchun, China**

Supplementary Table 1

## Parameters of MS

| Compound                       | m/z         | DP (ev) | CE (ev) |
|--------------------------------|-------------|---------|---------|
| Clop-AM                        | 504.1/354.1 | 70      | 26      |
| IS (Bifendate)                 | 436.0/386.9 | 35      | 19      |
| Clopidogrel                    | 322.1/212.0 | 52      | 22      |
| Clop-Acid                      | 308.1/141.2 | 70      | 55      |
| IS (Bifendate)                 | 436.0/386.9 | 35      | 19      |
| acetaminophen                  | 152.1/110.1 | 50      | 22      |
| 4-hydroxymephenytoin           | 235.3/150   | 55      | 25      |
| 6 $\beta$ -hydroxytestosterone | 305.2/269.1 | 65      | 20      |
| 4-hydroxytolbutamide           | 287.3/171.0 | 60      | 25      |
| dextrophan                     | 258.1/199.2 | 60      | 37      |
| a-hydroxymidazolam             | 342.2/203   | 65      | 37      |
| hydroxybupropion               | 256.3/238.2 | 60      | 17      |
| IS (Oxcarbazepine)             | 253.1/208   | 80      | 26      |
